# Supplementary material
Source: PubMed Central journal article supplement (PMC3249503)

**Supplementary Table S1.** The structure and function of segment-swapped proteins as annotated in various databases

| PDB chains (central protein listed first) | Name or function                                    | SCOP                                                                     | CATH                                                               | main function from GO or literature           | Summary                                                                                                               |
|-------------------------------------------|-----------------------------------------------------|--------------------------------------------------------------------------|--------------------------------------------------------------------|-----------------------------------------------|-----------------------------------------------------------------------------------------------------------------------|
| 1rf6A                                     | 5-enolpyruvyl-shikimate-3-phosphate synthase        | $\alpha+\beta$ ; 6 repeats of IF3 fold organized into two RPTC like doms | $\alpha-\beta$ prism                                               | enzyme, transferase                           | $\alpha-\beta$ prism (6 repeats of IF3 fold organized into two RPTC (RNA 3'-terminal phosphate cyclase)-like domains) |
| 2yvwA                                     | UDP-N-acetylglucosamine 1-carboxyvinyltransferase   | -                                                                        | $\alpha-\beta$ prism                                               | enzyme, transferase                           |                                                                                                                       |
| 1g6sA                                     | EPSP synthase                                       | same                                                                     | $\alpha-\beta$ prism                                               | same                                          |                                                                                                                       |
| 1ejdA                                     | UDP-N-acetylglucosamine enolpyruvyltransferase      | same                                                                     | $\alpha-\beta$ prism                                               | same                                          |                                                                                                                       |
| 2pqcA                                     | EPSP synthase                                       | -                                                                        | $\alpha-\beta$ prism                                               | same                                          |                                                                                                                       |
| 2o0bA                                     | EPSP synthase                                       | -                                                                        | -                                                                  | same                                          |                                                                                                                       |
| 2r11A                                     | UDP-N-acetylglucosamine 1-carboxyvinyltransferase   | -                                                                        | $\alpha-\beta$ prism                                               | same                                          |                                                                                                                       |
| 2ql3A                                     | LysR transcriptional regulator, C-term dom          | -                                                                        | 3-layer $\alpha\beta\alpha$ sandwich, maltodextrin binding protein | transcription regulator                       | 3-layer $\alpha\beta\alpha$ sandwich, periplasmic binding protein-like II                                             |
| 3hhfA                                     | CrgA reg dom (LysR type transcr. reg)               | -                                                                        | -                                                                  | transcription regulator                       |                                                                                                                       |
| 1ixcA                                     | CbnR (LysR type transcr. reg)                       | $\alpha/\beta$ ; Periplasmic binding protein-like II                     | same                                                               | transcription regulator                       |                                                                                                                       |
| 1yavA                                     | B. subtilis, unknown function                       | $\alpha+\beta$ ; CBS domain pair                                         | -                                                                  | adenosyl binding                              | $\alpha+\beta$ ; CBS domain pair                                                                                      |
| 3hf7A                                     | Uncharacterized CBS domain pair                     | -                                                                        | -                                                                  | adenosyl binding                              |                                                                                                                       |
| 2emqA                                     | G. caustophilus, unknown function                   | -                                                                        | -                                                                  | adenosyl binding                              |                                                                                                                       |
| 2r58A                                     | Polycomb protein, sex comb on midleg (SCM) protein  | -                                                                        | domain 1: SH3 type barrel                                          | transcription regulator                       | all- $\beta$ , SH3-like barrel, two MBT repeats                                                                       |
| 2bivA                                     | Sex comb on midleg like protein 2 (Scml2)           | all- $\beta$ ; SH3-like barrel, two MBT repeats                          | same                                                               | transcription regulator                       |                                                                                                                       |
| 1oz2A*                                    | Lethal (3) malignant brain tumor (MBT)-like protein | same                                                                     | same                                                               | cell cycle regulator, transcription regulator |                                                                                                                       |
| 1wcwA                                     | Uroporphyrinogen III synthase (T. thermo.)          | -                                                                        | 3-layer $\alpha\beta\alpha$ sandwich, Rossmann fold                | enzyme, lyase                                 | 3-layer $\alpha\beta\alpha$ sandwich, Rossmann, HemD-like                                                             |
| 1jr2A                                     | Uroporphyrinogen III synthase (human)               | $\alpha/\beta$ ; HemD-like                                               | same                                                               | enzyme, lyase                                 |                                                                                                                       |
| 1n00A                                     | Annexin GH1 (cotton)                                | all- $\alpha$ , Annexin                                                  | 4 domains, mainly- $\alpha$ , orthog. bundle, Annexin V domain 1   | membrane binding                              | all- $\alpha$ , orthogonal bundle, annexin                                                                            |
| 1dk5A                                     | Annexin 24(ca32)                                    | all- $\alpha$ , Annexin                                                  | same                                                               | phospholipid binding                          |                                                                                                                       |

|       |                                                                                    |                                                                                                 |                                                                                         |                                                   |                                                                                            |
|-------|------------------------------------------------------------------------------------|-------------------------------------------------------------------------------------------------|-----------------------------------------------------------------------------------------|---------------------------------------------------|--------------------------------------------------------------------------------------------|
| 3d3aA | $\beta$ -galactosidase                                                             | -                                                                                               | -                                                                                       | enzyme, hydrolase                                 | 2-layer $\beta$ sandwich                                                                   |
| 2vqaA | SLL1358 protein MncA, periplasmic metal binding protein, cupin                     | -                                                                                               | -                                                                                       | metal binding                                     | Double-stranded $\beta$ helix with three short $\alpha$ helices added                      |
| 2qqrA | Jumonji domain containing histone demethylation protein 3A                         | all- $\beta$ , SH3-like barrel, tandem repeat of two segment-swapped Tudor domains              | -                                                                                       | enzyme, oxidoreductase (demethylase)              | SH3-like, Jumonji domain, two segment-swapped Tudor domains                                |
| 2q5cA | NtrC family transcriptional regulator                                              | $\alpha/\beta$ ; Chelatase-like, PrpR receptor domain-like                                      | dom 1: 3-layer $\alpha\beta\alpha$ sandwich, Rossmann; dom 2: PrpR receptor domain like | transcriptional regulator                         | 3-layer $\alpha\beta\alpha$ sandwich, Rossmann? PrpR receptor domain-like                  |
| 2q0tA | Putative gamma-carboxymuconolactone decarboxylase                                  | all- $\alpha$ , AhpD-like, duplication: subunits form a helix-swapped trimer                    | mainly $\alpha$ , up-down bundle, AhpD-like                                             | enzyme, lyase, decarboxylase                      | all- $\alpha$ up-down bundle AhpD-like. Note: Swapping is also present between subunits!   |
| 2jh3A | DR2241, ribosomal protein S2 related protein, CbiX                                 | -                                                                                               | -                                                                                       | unknown, may be related to cobalamin biosynthesis | 3-layer $\alpha\beta\alpha$ sandwich, Rossmann?                                            |
| 2hcrA | phosphoribosyl pyrophosphate synthetase I                                          | -                                                                                               | domain 1: 3-layer $\alpha\beta\alpha$ sandwich, Rossmann fold;                          | enzyme, transferase                               | 3-layer $\alpha\beta\alpha$ sandwich, Rossmann?                                            |
| 2h9fA | Unknown function, DUF453                                                           | $\alpha+\beta$ ; Diaminopimelate epimerase-like, PA0793-like                                    | ab, Roll, Diaminopimelate epimerase                                                     | unknown, may be enzyme, isomerase (PrpF)          | ab roll, diaminopimelate epimerase like                                                    |
| 2et6A | Hydroxyacyl-CoA dehydrogenase domain of multifunctional $\beta$ -oxidation protein | -                                                                                               | -                                                                                       | enzyme, oxidoreductase                            | 3-layer $\alpha\beta\alpha$ sandwich, NAD(P)-binding Rossmann fold                         |
| 2b5iD | Interleukin-2 receptor $\alpha$ chain                                              | small disulphide-rich all- $\beta$ ; segment-swapped SCR/Sushi domains                          | -                                                                                       | receptor                                          | all- $\beta$ , disulphide-rich, complement control module, two segment-swapped SCR domains |
| 2a90A | WWE domain of Deltex protein (Drosophila)                                          | $\alpha+\beta$ ; WWE domain fold                                                                | -                                                                                       | Signaling, protein-protein interaction            | $\alpha+\beta$ , WWE domain                                                                |
| 1y3tA | YxaG, quercetin 2,3-dioxygenase                                                    | all- $\beta$ ; Double-stranded $\beta$ -helix, RmlC-like cupins, Quercetin 2,3-dioxygenase-like | -                                                                                       | enzyme, oxidoreductase                            | double-stranded $\beta$ helix, RmlC-like cupins, Quercetin 2,3-dioxygenase-like            |

**Supplementary Table S2.** The 12 central proteins of the permissively defined segment-swapped proteins along with their structure and function as annotated in various databases. A full listing of the families can be found in Supplementary Dataset S1. According to the permissive definition, a protein was considered as segment-swapped when  $TM(BA,M) > 0.5$  (i.e. Domain 1 with its segments swapped was found similar to Domain 2) without making sure that segment-wise structural similarity also applies; i.e. alignment coverages were not checked, and TM-scores were normalized by the length of the shorter chain, thus allowing for large insertions and deletions. This definition is intentionally loose in order to identify proteins that might have originated by segment-swapping but where the domains have diverged too much for a confident detection of segment-swapping. Using these criteria, 452 potential segment-swapped proteins were identified in ReprPDB; these could be clustered into 57 clusters. The central proteins of these clusters were compared to those found using the stricter definition. Out of the 57 central proteins, 12 had global structural similarity (TM-score  $>0.5$ ) to a segment-swapped protein found by the stricter definition, and 7 had structural similarity limited to one domain. From the remaining 38 central proteins, 26 were found to be false hits ( $\beta$ -propellers,  $(\beta\alpha)_8$ -barrels,  $\alpha\alpha$ -barrels, etc.). Finally, 12 central proteins (representing 84 proteins) appear to be valid potential segment-swapped proteins that had not been identified by the stricter definition. A visual inspection of the structures confirmed that segment-swapping may have occurred in these cases, but a distortion of the domain structure, or large insertions (e.g. in 2nydA), deletions, or the addition or removal of large terminal segments (e.g. in 3i04A or 2gagC) made the domains too dissimilar to unambiguously recognize these cases as segment-swapped proteins. In some less convincing cases, the extent of the swap is fairly small (e.g. only a single  $\beta$ -strand is “swapped” between the domains, like in 3gc3A or the 5-domain 3hrzA).

| PDB chains | Name or function                                                 | SCOP                                                   | CATH                                                   | main function from GO or literature | Summary                                       |
|------------|------------------------------------------------------------------|--------------------------------------------------------|--------------------------------------------------------|-------------------------------------|-----------------------------------------------|
| 3ladA      | lipoamide dehydrogenase                                          | 3-layer $\beta\beta\alpha$ , FAD/NAD(P) binding domain | 3-layer $\beta\beta\alpha$ , FAD/NAD(P) binding domain | oxidoreductase                      | 3-layer $\beta\beta\alpha$ sandwich           |
| 3h8IA      | sulfide:quinine oxidoreductase                                   | -                                                      | -                                                      | oxidoreductase                      |                                               |
| 2zbwA      | thioredoxin reductase like                                       | -                                                      | 3-layer $\beta\beta\alpha$ , FAD/NAD(P) binding domain | ?                                   |                                               |
| 3i04A      | bifunctional carbon monoxide dehydrogenase / acetyl-CoA synthase | -                                                      | -                                                      | enzyme                              | 3-layer $\alpha\beta\alpha$ sandwich          |
| 2rkbA      | serine dehydratase like-1                                        | -                                                      | 3-layer $\alpha\beta\alpha$ , Rossmann fold            | ?                                   |                                               |
| 2nydA      | unknown                                                          | -                                                      | -                                                      | ?                                   |                                               |
| 3delB      | arginine binding protein                                         | -                                                      | -                                                      | transport                           |                                               |
| 3gc3A      | clathrin heavy chain 1                                           | -                                                      | -                                                      | scaffold                            | 2-layer $\beta$ -sandwich                     |
| 2f68X      | collagen adhesin                                                 | -                                                      | -                                                      | binding                             |                                               |
| 3hrzA      | cobra venom factor                                               | -                                                      | -                                                      | binding                             |                                               |
| 2gagC      | heterotetrameric sarcosine oxidase gamma subunit                 | -                                                      | -                                                      | metalloenzyme                       | $\alpha\beta$ sandwich                        |
| 2aprA      | aspartic proteinase                                              | $\beta$ -barrel, pepsin-like                           | $\beta$ -barrel                                        | enzyme                              | complex fold with $\beta$ -barrels and sheets |

**Supplementary Table S3.** Comparisons of fold ages of the two domains (Domain 1, AB-type; Domain 2, BA-type) of the SSPs listed in Table 1. The numbers of domain analogs (pooled for each family) and their source organisms in ReprPDB and in 22 genomes, respectively, are listed for each protein family. Higher numbers suggest older folds. The last column shows the phylogenetic position corresponding to the first appearance of each fold as determined in a phylogenetic tree of the 22 organisms. The position is the height of the node of earliest appearance of the fold as counted from the root of the tree; thus, higher numbers indicate a younger fold. Families where any of the domain folds was found in less than 2 species were omitted.

| Group                                | Central protein | In ReprPDB                           |                                                                           |                                                          | In 22 genomes                                        |                                                      |                                                       |
|--------------------------------------|-----------------|--------------------------------------|---------------------------------------------------------------------------|----------------------------------------------------------|------------------------------------------------------|------------------------------------------------------|-------------------------------------------------------|
|                                      |                 | All domain analogs AB-type / BA-type | Domain analogs with <30% sequence identity <sup>a</sup> AB-type / BA-type | Source organisms of all domain analogs AB-type / BA-type | Proteins containing domain analogs AB-type / BA-type | Source organisms of domain analogs AB-type / BA-type | Phylogenetic position of appearance AB-type / BA-type |
| Mainly- $\alpha$                     | 1n00A           | 0 / 0                                | 0 / 0                                                                     | 0 / 0                                                    | 0 / 1                                                | 0 / 1                                                |                                                       |
|                                      | 2q0tA           | 1 / 0                                | 1 / 0                                                                     | 1 / 0                                                    | 21 / 1                                               | 11 / 1                                               |                                                       |
| Mainly- $\beta$                      | 2r58A           | 0 / 4                                | 0 / 4                                                                     | 0 / 1                                                    | 3 / 0                                                | 2 / 0                                                |                                                       |
|                                      | 2qqrA           | 189 / 0                              | 54 / 0                                                                    | 43 / 0                                                   | 67 / 0                                               | 6 / 0                                                |                                                       |
|                                      | 3d3aA           | 78 / 13                              | 41 / 11                                                                   | 37 / 11                                                  | 0 / 0                                                | 0 / 0                                                |                                                       |
|                                      | 2b5iD           | 43 / 0                               | 8 / 0                                                                     | 4 / 0                                                    | 32 / 5                                               | 4 / 3                                                | 1 / 20                                                |
|                                      | 1y3tA           | 2 / 0                                | 2 / 0                                                                     | 2 / 0                                                    | 13 / 0                                               | 5 / 0                                                |                                                       |
| 3-layer $\alpha\beta\alpha$ sandwich | 2ql3A           | 15 / 1                               | 5 / 1                                                                     | 13 / 1                                                   | 11 / 4                                               | 9 / 4                                                | 0 / 1                                                 |
|                                      | 1wcvA           | 415 / 200                            | 196 / 110                                                                 | 137 / 98                                                 | 212 / 13                                             | 21 / 10                                              | 0 / 2                                                 |
|                                      | 2q5cA           | 88 / 40                              | 48 / 24                                                                   | 43 / 24                                                  | 31 / 9                                               | 20 / 8                                               | 0 / 1                                                 |
|                                      | 2et6A           | 0 / 0                                | 0 / 0                                                                     | 0 / 0                                                    | 12 / 1                                               | 6 / 1                                                |                                                       |
|                                      | 2hcrA           | 295 / 136                            | 115 / 75                                                                  | 105 / 66                                                 | 10 / 5                                               | 9 / 5                                                | 0 / 0                                                 |
|                                      | 2jh3A           | 143 / 12                             | 49 / 10                                                                   | 67 / 10                                                  | 5 / 11                                               | 4 / 10                                               | 0 / 0                                                 |
| Other $\alpha\beta$                  | 1rf6A           | 0 / 0                                | 0 / 0                                                                     | 0 / 0                                                    | 0 / 0                                                | 0 / 0                                                |                                                       |
|                                      | 1yavA           | 0 / 1                                | 0 / 1                                                                     | 0 / 1                                                    | 68 / 1                                               | 20 / 1                                               |                                                       |
|                                      | 2vqaA           | 0 / 0                                | 0 / 0                                                                     | 0 / 0                                                    | 35 / 8                                               | 2 / 6                                                | 1 / 1                                                 |
|                                      | 2h9fA           | 0 / 0                                | 0 / 0                                                                     | 0 / 0                                                    | 0 / 0                                                | 0 / 0                                                |                                                       |
|                                      | 2a90A           | 0 / 0                                | 0 / 0                                                                     | 0 / 0                                                    | 7 / 2                                                | 2 / 1                                                |                                                       |

<sup>a</sup> The number of analogs after reducing the set to <30% pairwise sequence identity.

**Figure S1.** A full gallery of segment-swapped proteins

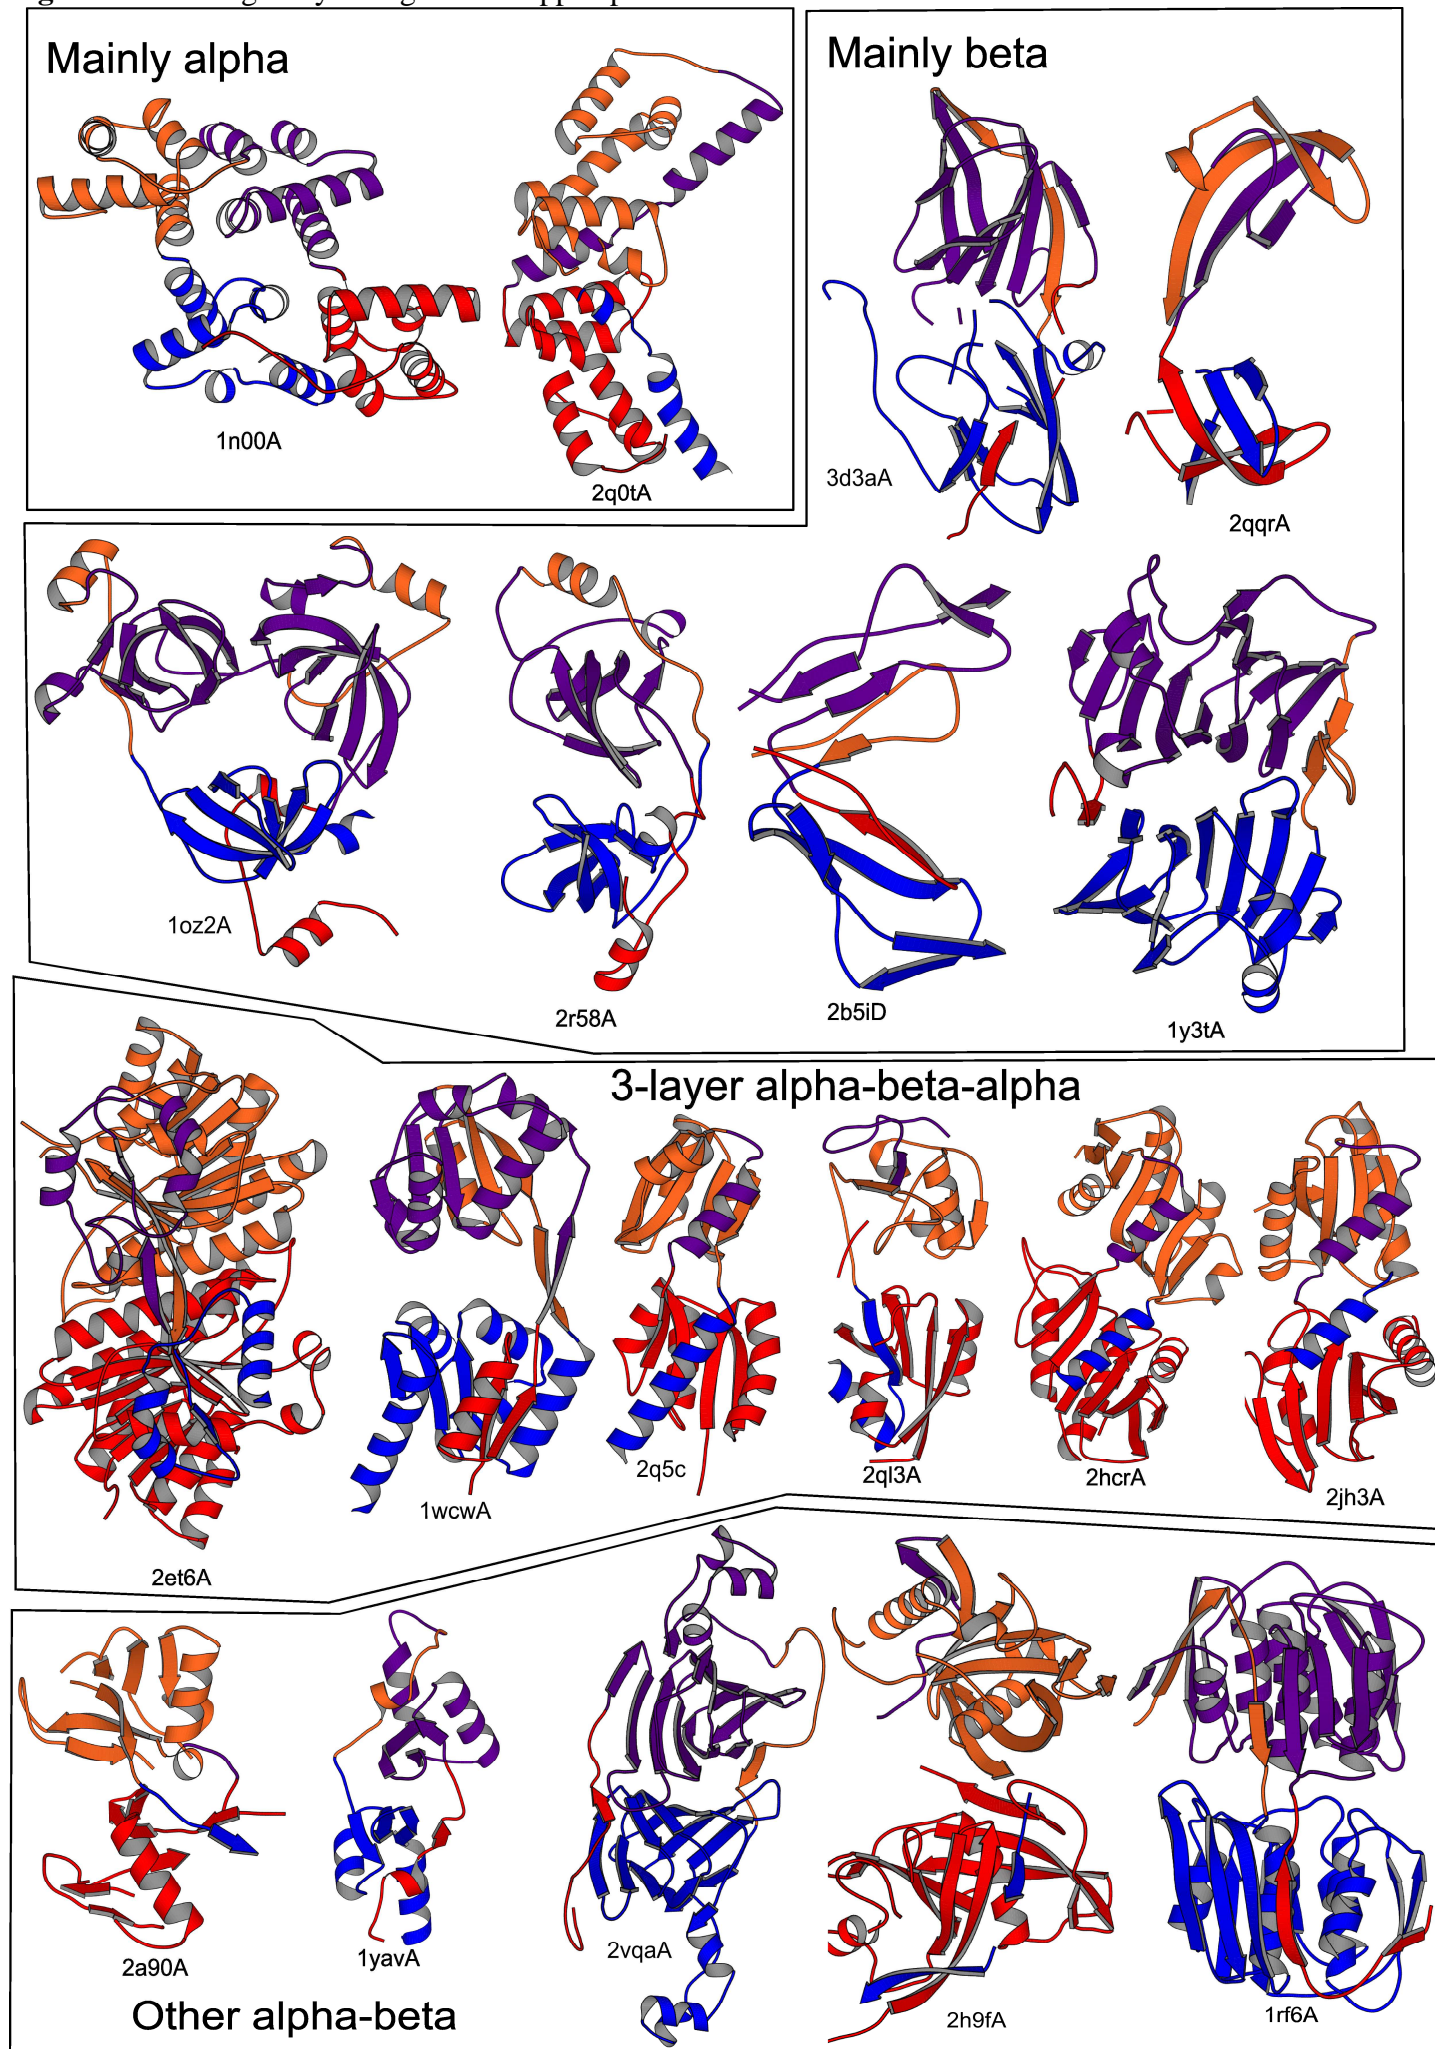

**Figure S2.** Major circular permutants of Domain 2 of 1wcwA. We scanned ReprPDB for circular permutants of the domain fold of 1wcwA, and found 291 hits. These were grouped by the amount of shift relative to 1wcwA, and those with a shift value difference  $<5$  were unified. Almost all loops in the domain fold are potential sites for circular permutant generation. The topology cartoon, drawn in TOPS [60] style, represents the structure of Domain 2 of 1wcwA (triangular symbols indicate  $\beta$ -strands and circular ones helices). Scissors icons mark the approximate locations of the sites where the N- (and C-) termini of several identified circular permutants (indicated with their PDB codes) align by structural alignment.

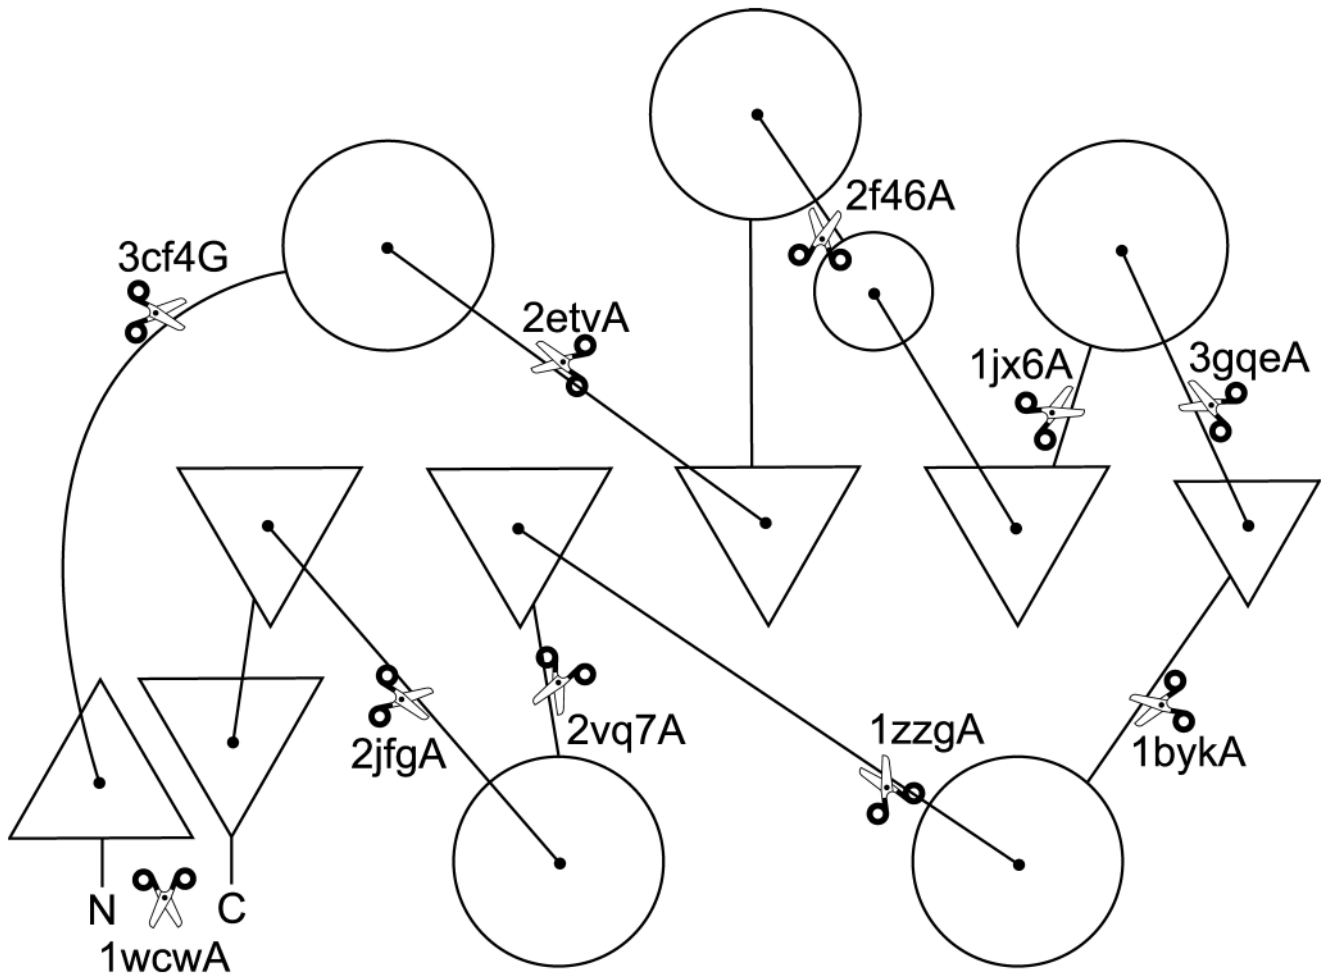

**Figure S3.** Schematic representation of SSP variants generated from the same base fold by different mechanisms. (a) Variants generated by the DSF mechanism (depending on where the domains open up to get rearranged) have different continuous domains while the continuous domains are similar to each other apart from the site where the continuous domain is inserted into them. (b) Variants generated by the CP mechanism (depending on where the circularized chain is cut to produce the two termini) have different discontinuous domains while the continuous domains are similar to each other.

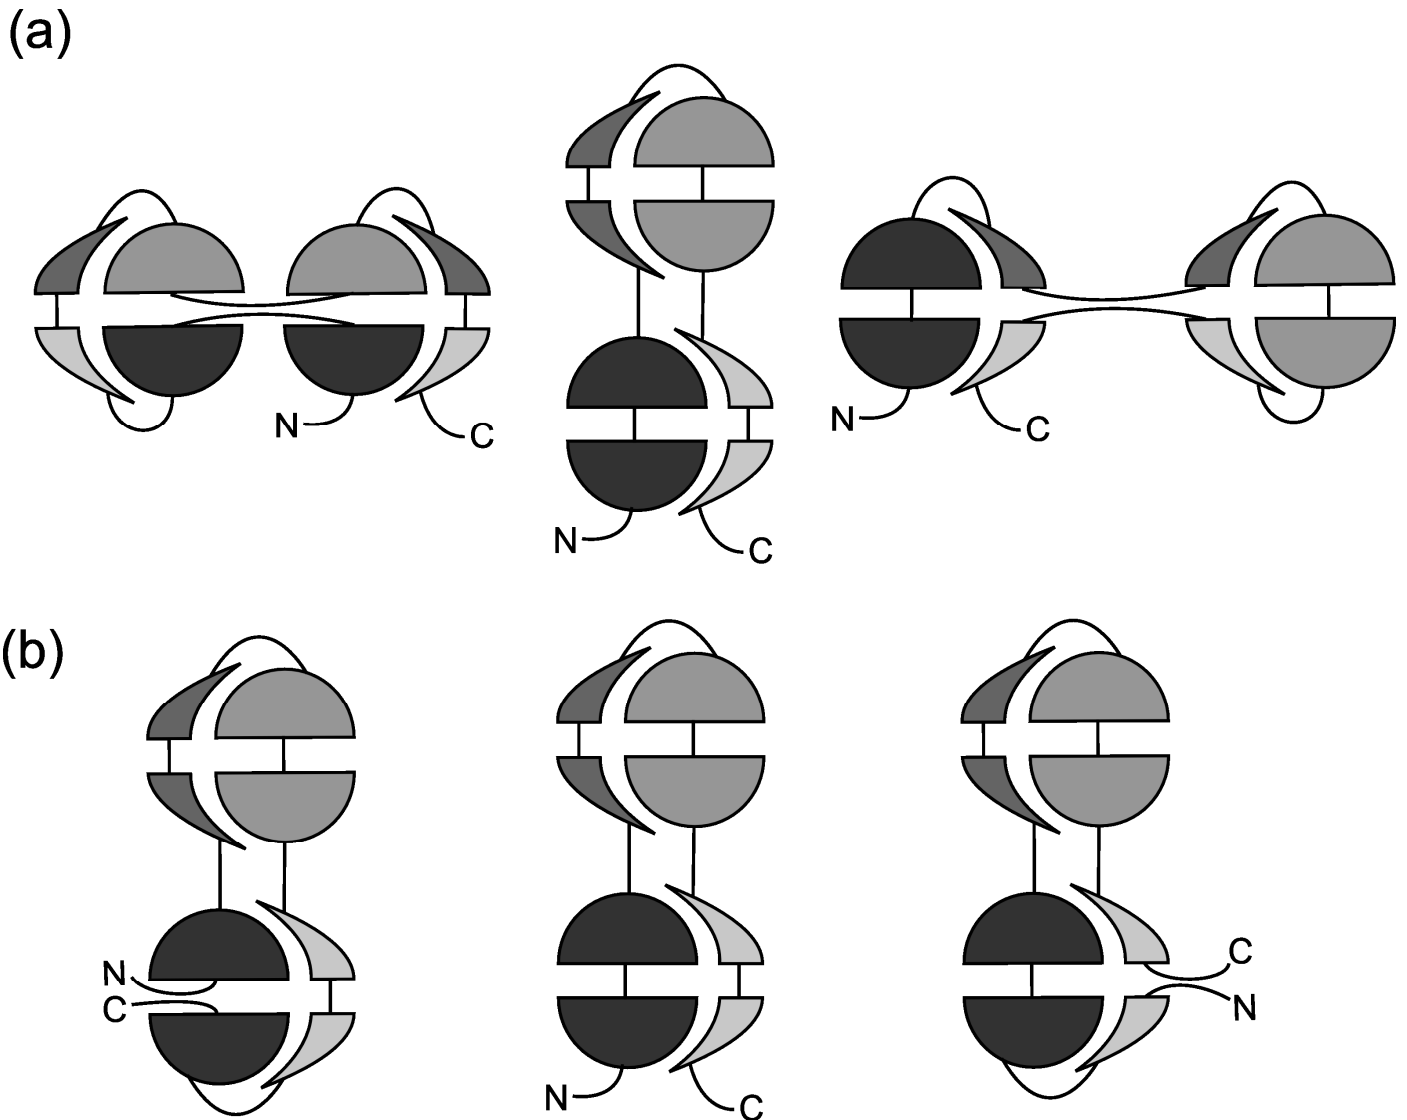

Supplement: NIHMS336760-supplement-01.pdf [file NIHMS336760-supplement-01.pdf]
